# Supplementary material for: Evolutionarily Conserved Network Properties of Intrinsically Disordered Proteins
Source: PubMed Central journal article supplement (PMC4431869; doi:10.1371/journal.pone.0126729), 2015-05-14

Degree distribution of all nodes and IDP nodes based on STRING physical interactions

(a) Yeast

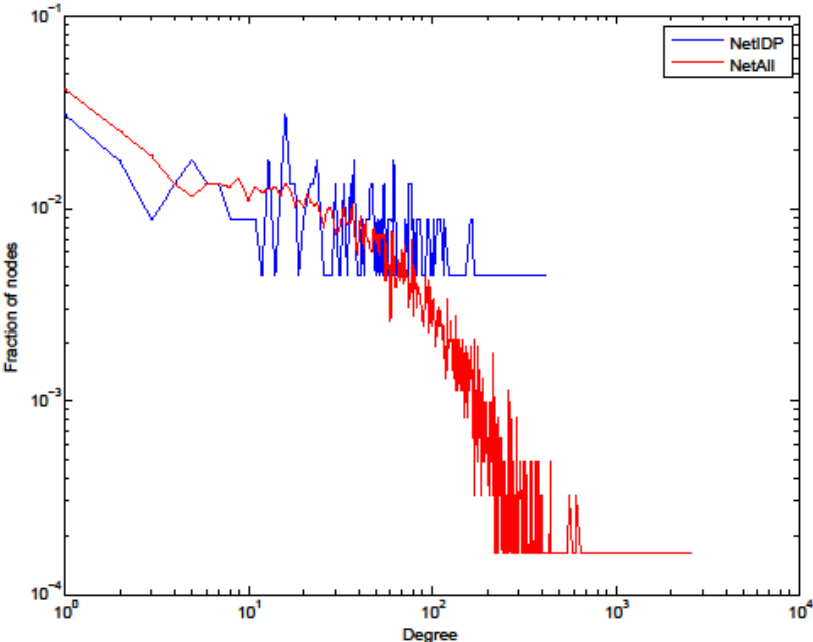

(b) *Drosophila*

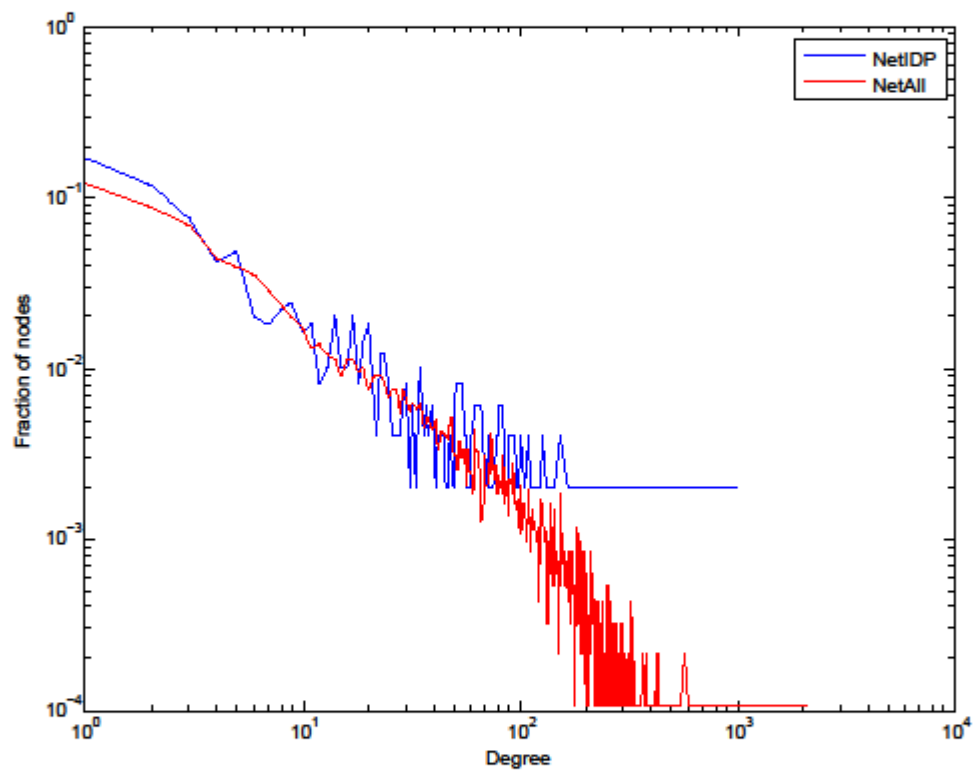

(c) Mouse

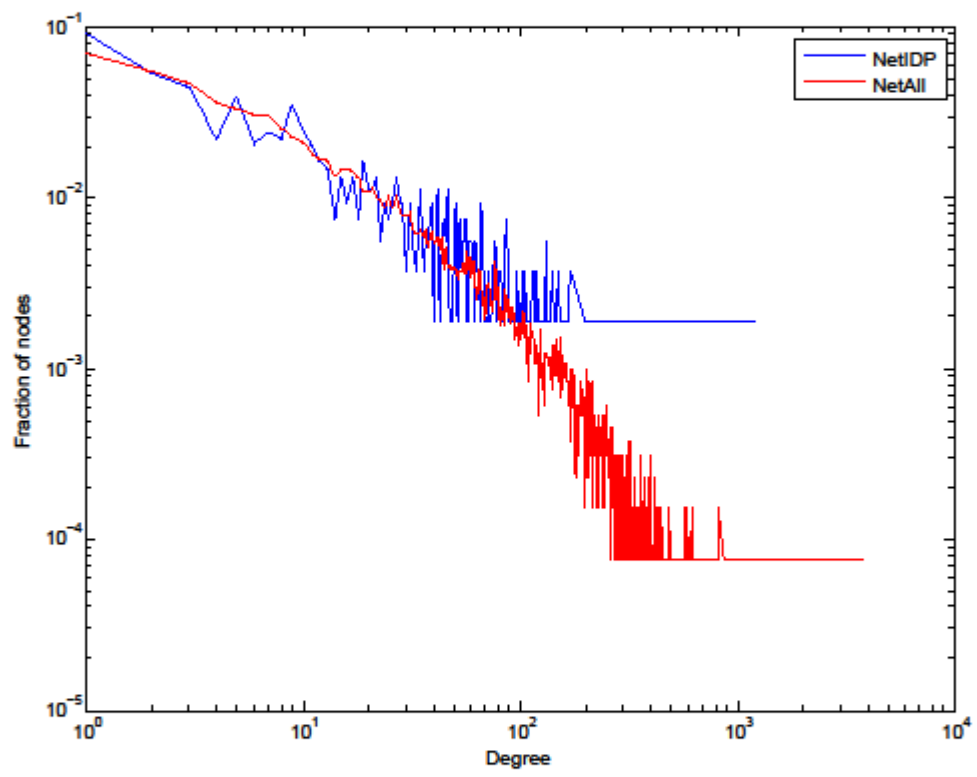

(d) Human

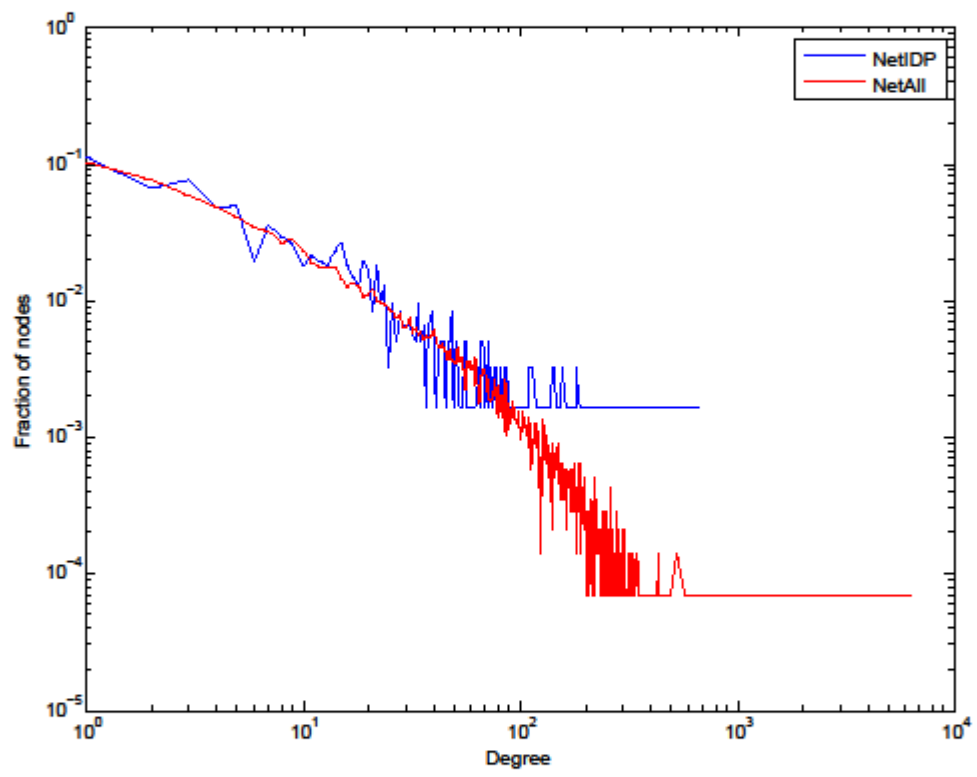

Supplement: pone.0126729.s001.pdf [file pone.0126729.s001.pdf]
